# Supplementary material for: Ionic Liquid Meets MOF: A Facile Method to Optimize the Structure of CoSe2‐NiSe2 Heterojunctions with N, P, and F Triple‐Doped Carbon Using Ionic Liquid for Efficient Hydrogen Evolution and Flexible Supercapacitors
Source: PubMed Central journal article supplement (PMC9982578; doi:10.1002/advs.202206029), 2023-01-13
Supplement: ADVS-10-2206029-s001.pdf [file ADVS-10-2206029-s001.pdf]

## Supporting Information

for *Adv. Sci.*, DOI 10.1002/advs.202206029

Ionic Liquid Meets MOF: A Facile Method to Optimize the Structure of CoSe<sub>2</sub>-NiSe<sub>2</sub> Heterojunctions with N, P, and F Triple-Doped Carbon Using Ionic Liquid for Efficient Hydrogen Evolution and Flexible Supercapacitors

*Mingjie Yi, Jiayu Ma, Yi Ren, Hao Wang, Lin Xie, Zhenye Zhu\* and Jiaheng Zhang\**

**Ionic Liquid Meets MOF: A Facile Method to Optimise the Structure of CoSe<sub>2</sub>-NiSe<sub>2</sub> Heterojunctions with N, P, and F Triple-Doped Carbon Using Ionic Liquid for Efficient Hydrogen Evolution and Flexible Supercapacitors**

*Mingjie Yi, Jiayu Ma, Yi Ren, Hao Wang, Lin Xie, Zhenye Zhu, Jiaheng Zhang*

M. J. Yi, J. Y. Ma, Y. Re, H. Wang, L. Xie, Prof. Z. Y. Zhu, Prof. J. H. Zhang

State Key Laboratory of Advanced Welding and Joining, Harbin Institute of Technology, Shenzhen 518055, Guangdong, China.

Email: [zhangjiaheng@hit.edu.cn](mailto:zhangjiaheng@hit.edu.cn); [zhuzy@hit.edu.cn](mailto:zhuzy@hit.edu.cn)

M. J. Yi, J. Y. Ma, Y. Re, H. Wang, L. Xie, Prof. Z. Y. Zhu, Prof. J. H. Zhang

Research Centre of Printed Flexible Electronics, School of Materials Science and Engineering, Harbin Institute of Technology, Shenzhen 518055, Guangdong, China.

Email: [zhangjiaheng@hit.edu.cn](mailto:zhangjiaheng@hit.edu.cn); [zhuzy@hit.edu.cn](mailto:zhuzy@hit.edu.cn)

### **Density functional theory calculations:**

For all density functional theory (DFT) calculations, we employed the Vienna ab initio simulation package (VASP) [1,2] within the generalised gradient approximation (GGA) using the Perdew–Burke–Ernzerhof (PBE) formulation [3]. We chose the projected augmented wave (PAW) potentials [4,5] to describe the ionic cores. The valence electrons were taken into account using a plane wave basis set with a kinetic energy cutoff of 400 eV. Partial occupancies of the Kohn-Sham orbitals were allowed using the Gaussian smearing method and a width of 0.05 eV. The electronic energy was considered self-consistent when the energy change was smaller than  $10^{-5}$  eV. Geometry optimisation was considered convergent when the force change was smaller than 0.05 eV/Å. Grimme's DFT-D3 methodology [6] was used to describe the dispersion interactions. The Brillouin zone was sampled with a gamma-centred  $2 \times 2 \times 1$  grid in all computational processes [7].

The adsorption energy of  $\text{OH}^-$  ( $E_{\text{ads}}$ ) was calculated as  $E_{\text{ads}} = E_{\text{total}} - E_{\text{slab}} - E_{\text{OH}^-}$ , where  $E_{\text{total}}$  and  $E_{\text{slab}}$  represent the energy with and without the  $\text{OH}^-$  of slab, and  $E_{\text{OH}^-}$  is the energy of an  $\text{OH}^-$  ion.

#### Calculation of free energies

The adsorption free energies of H atom on all structures were calculated by the formula  $\Delta G_{\text{H}}^* = \Delta E_{\text{H}}^* + \Delta \text{ZPE} - T\Delta S$ , where  $\Delta E_{\text{H}}^*$ ,  $\Delta \text{ZPE}$ , and  $\Delta S$  are the binding energy, zero-point energy change, and entropy change of H adsorption, respectively. The entropies and zero-point energies (ZPEs) of  $\text{H}_2$  and  $\text{H}^*$  came from previous reports [8, 9].

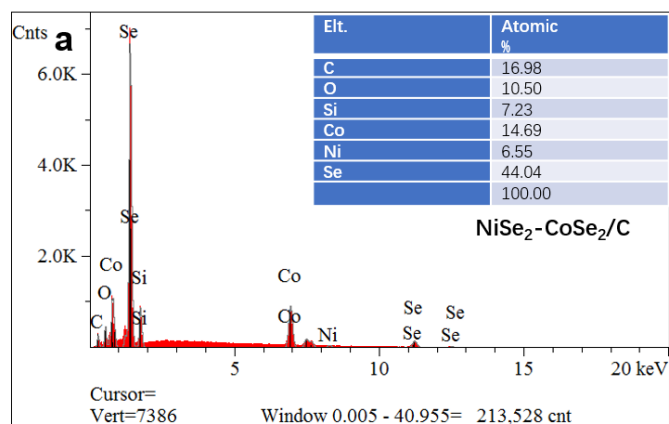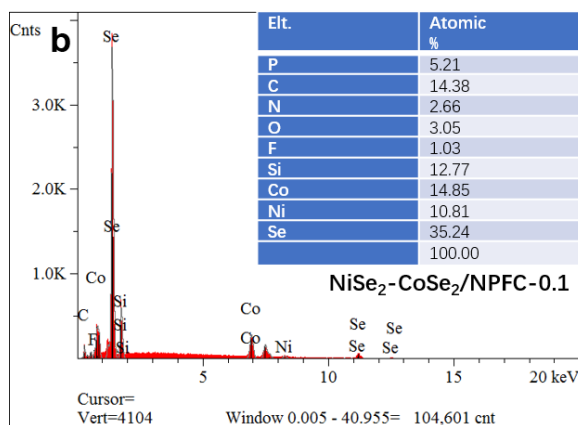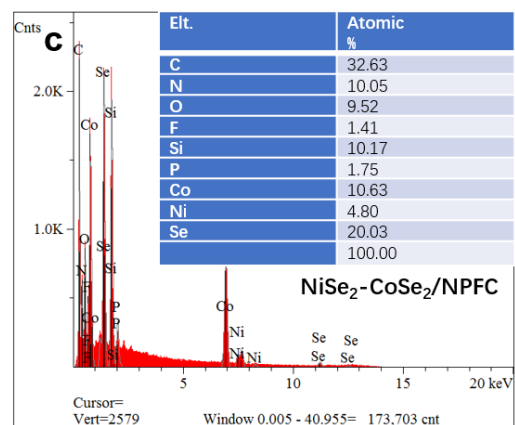

**Figure S1.** The EDS of (a) CoSe<sub>2</sub>-NiSe<sub>2</sub>/C, (b) CoSe<sub>2</sub>-NiSe<sub>2</sub>/NPFC-0.1, and (c) CoSe<sub>2</sub>-NiSe<sub>2</sub>/NPFC.

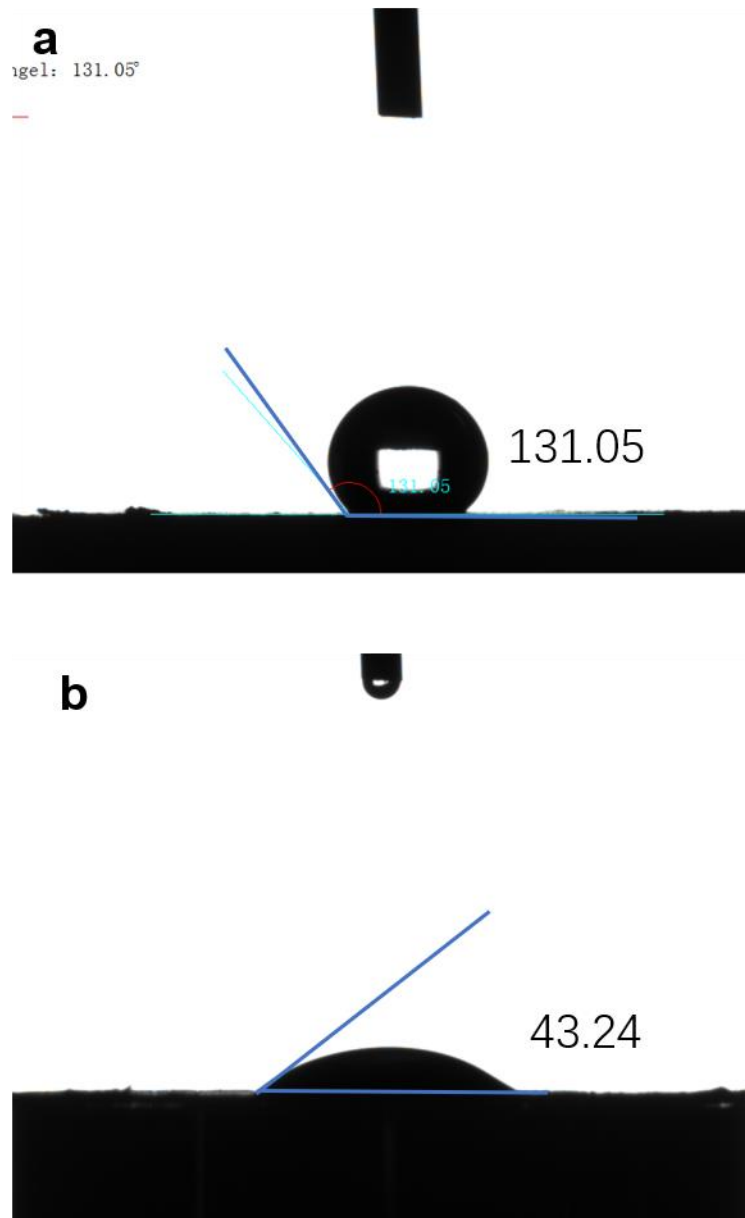

**Figure S2.** Images above and below show the water contact angles of (a)  $\text{CoSe}_2\text{-NiSe}_2/\text{C}$ , (b)  $\text{CoSe}_2\text{-NiSe}_2/\text{NPFC}$

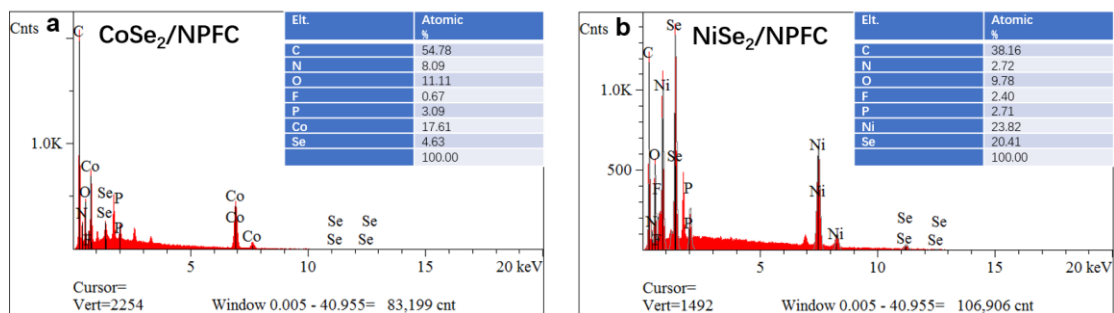

**Figure S3.** The EDS of (a) CoSe<sub>2</sub>-NiSe<sub>2</sub>/NPFC, (b) NiSe<sub>2</sub>/NPFC.

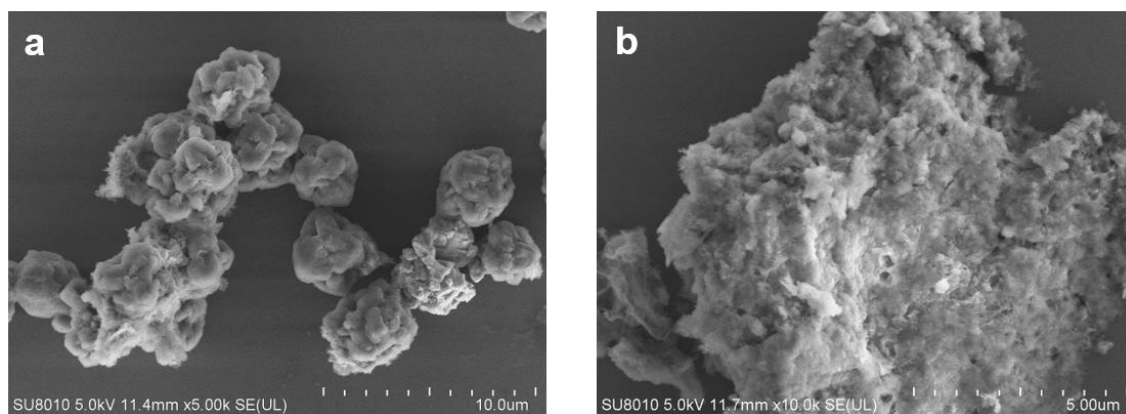

**Figure S4.** The SEM of (a) CoSe<sub>2</sub>/NPFC, (b) NiSe<sub>2</sub>/NPFC.

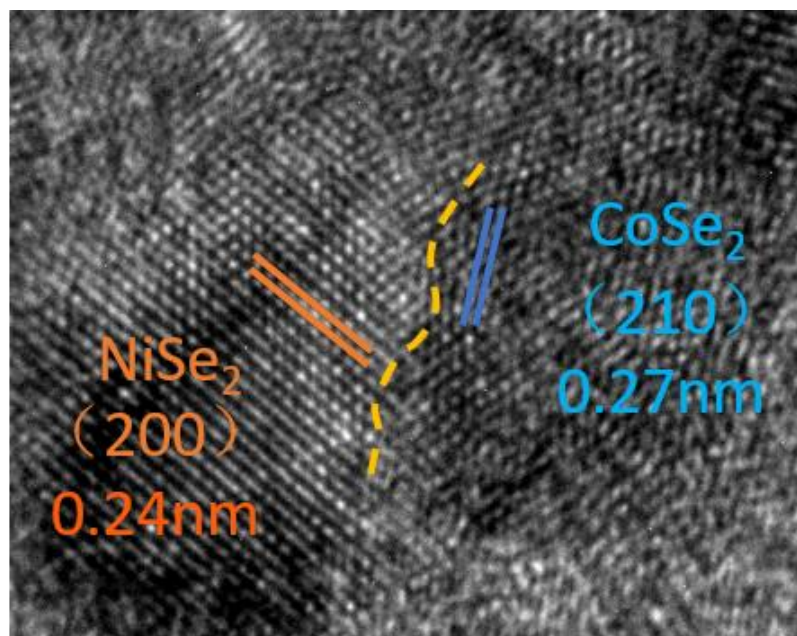

**Figure S5.** High-resolution TEM image of (a) CoSe<sub>2</sub>-NiSe<sub>2</sub>/NPFC.

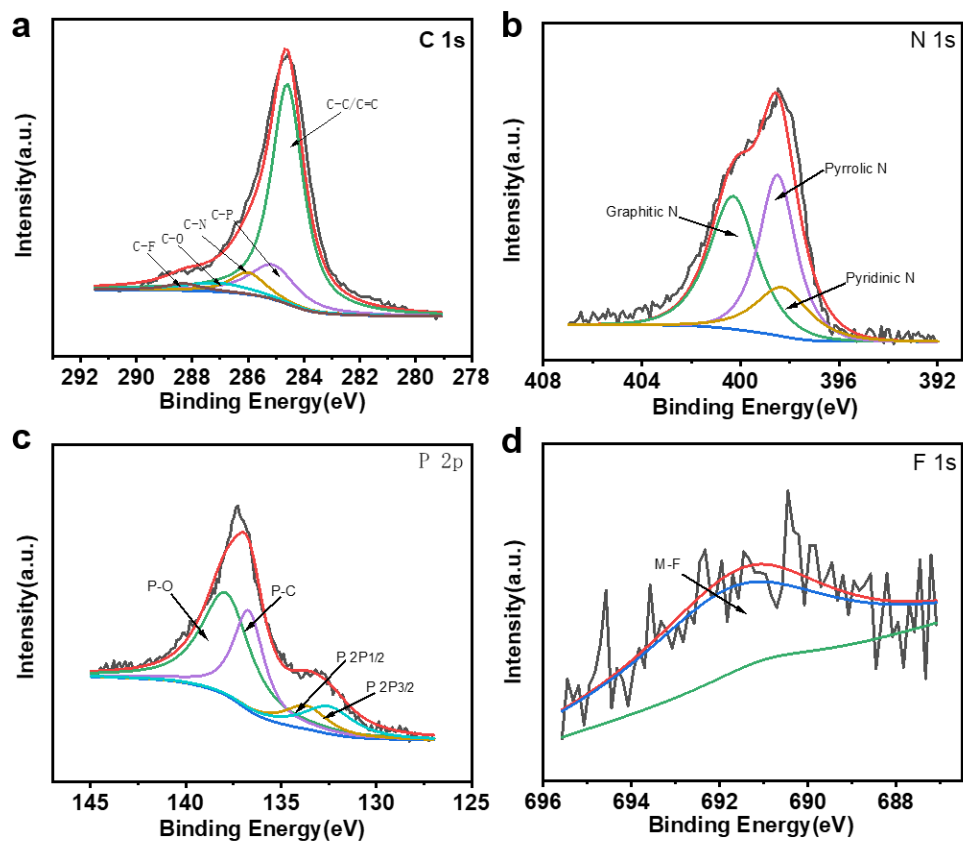

**Figure S6.** The XPS of (a) N 1s, (b)P 2p, (c)F 1s, and (d)C 1s.

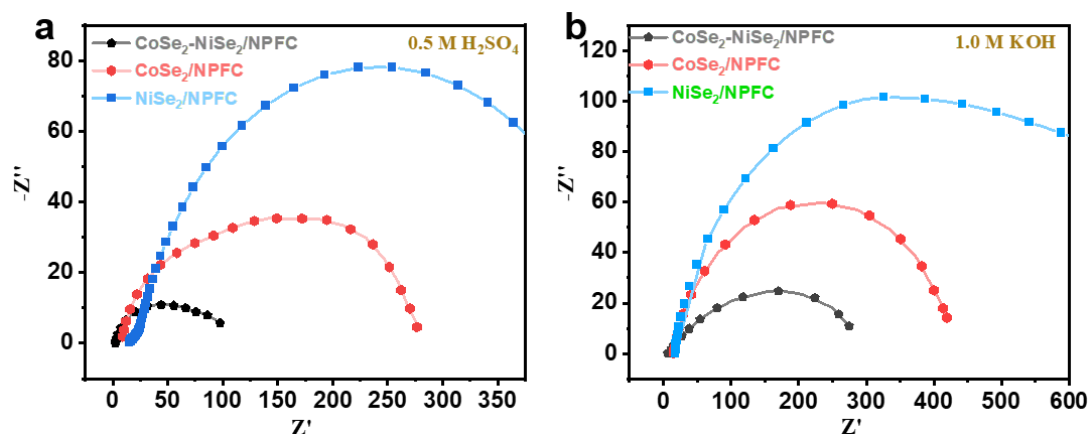

**Figure S7.** EIS of CoSe<sub>2</sub>-NiSe<sub>2</sub>/NPFC, CoSe<sub>2</sub>/NPFC and NiSe<sub>2</sub>/NPFC in (a) 0.5 H<sub>2</sub>SO<sub>4</sub> and (b) 1.0 M KOH.

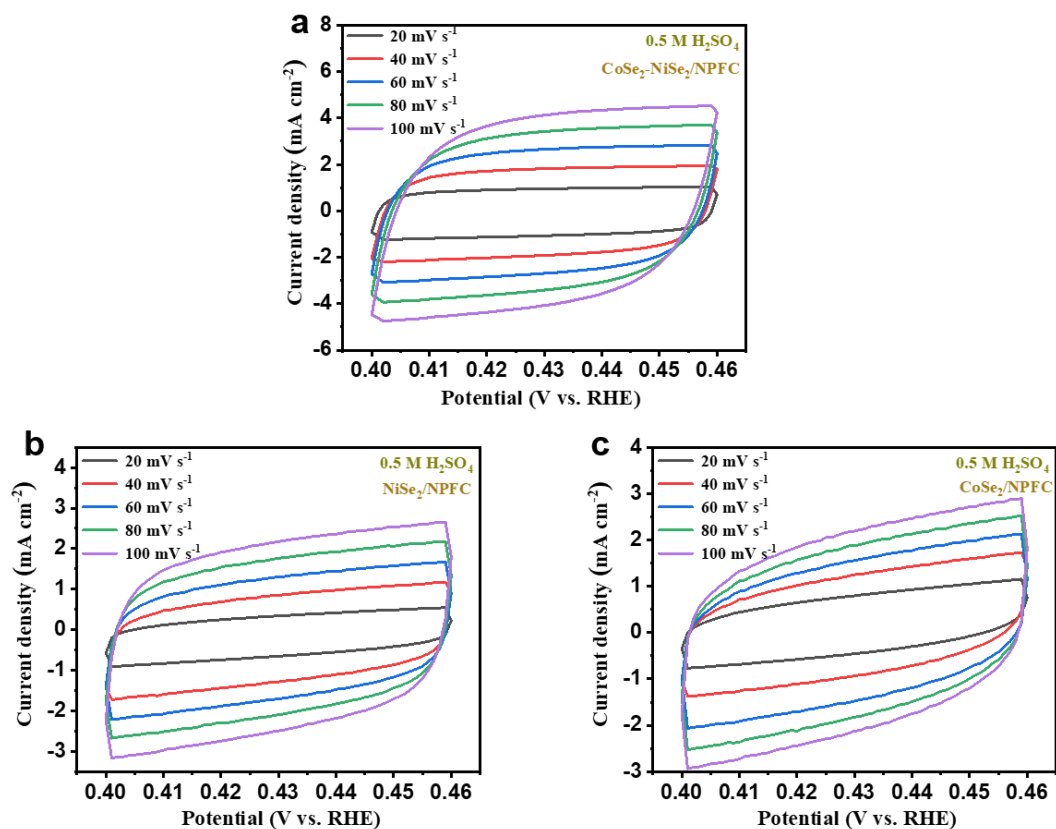

**Figure S8.** Oltammograms of (a) CoSe<sub>2</sub>-NiSe<sub>2</sub>/NPFC, (b) CoSe<sub>2</sub>/NPFC and (c) NiSe<sub>2</sub>/NPFC at various scan rates (10–100 mV s<sup>-1</sup>) used to estimate the Cdl and relative electrochemically active surface area in 0.5 M H<sub>2</sub>SO<sub>4</sub>.



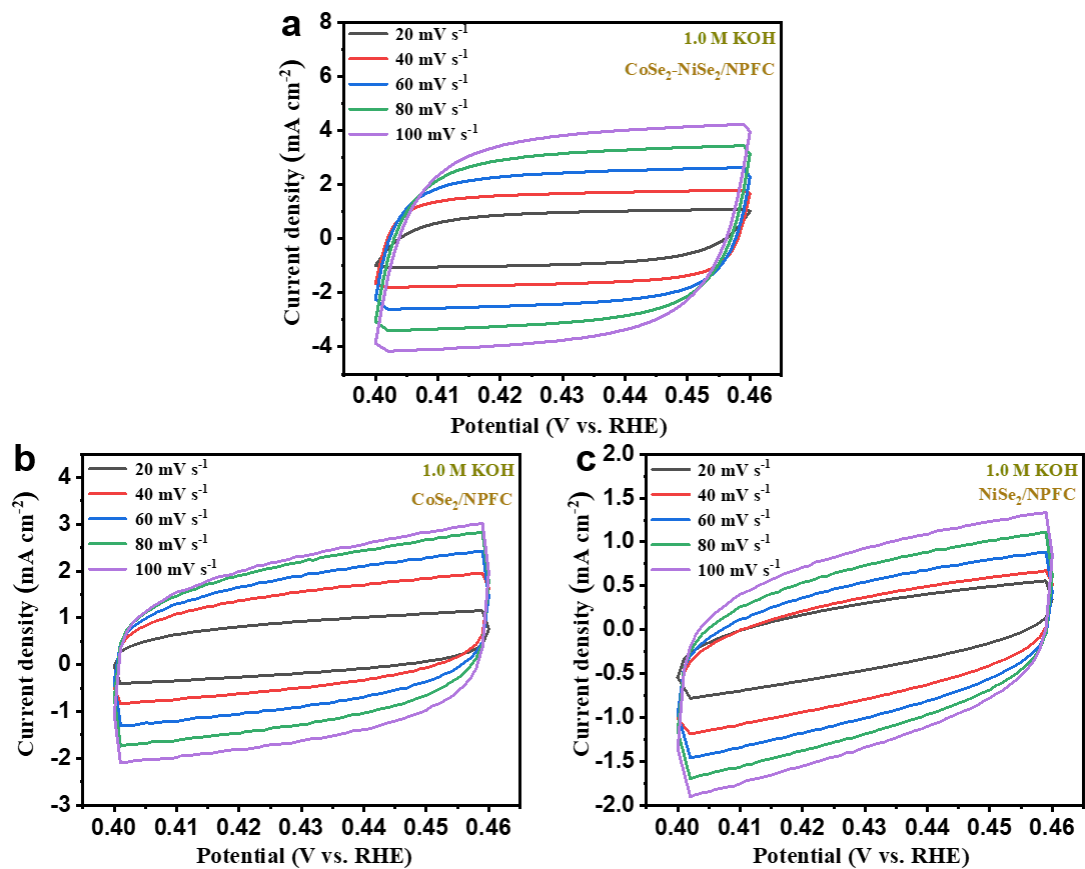

**Figure S9.** Oltammograms of (a) CoSe<sub>2</sub>-NiSe<sub>2</sub>/NPFC, (b) CoSe<sub>2</sub>/NPFC and (c) NiSe<sub>2</sub>/NPFC. at various scan rates (10–100 mV s<sup>-1</sup>) used to estimate the Cdl and relative electrochemically active surface area in 0.5 M 1.0 KOH.

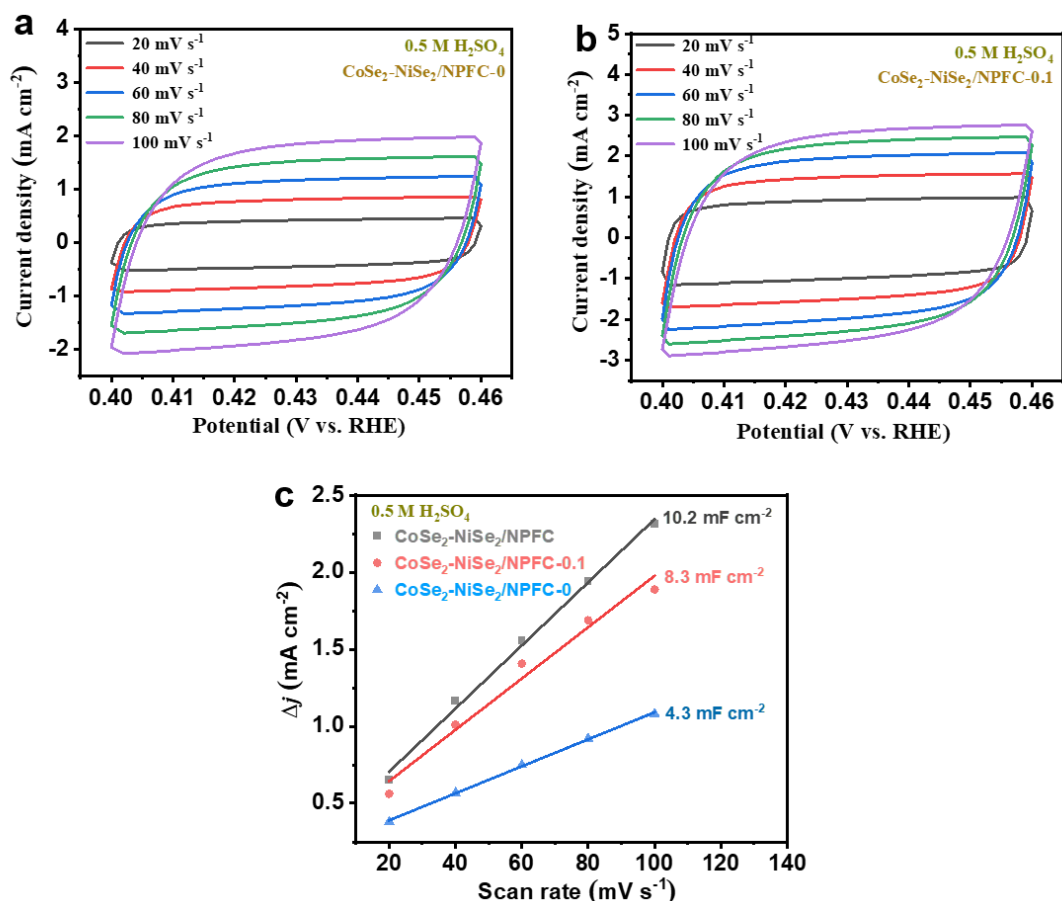

**Figure S10.** Oltammograms of (a) CoSe<sub>2</sub>-NiSe<sub>2</sub>/NPFC-0 and (b) CoSe<sub>2</sub>-NiSe<sub>2</sub>/NPFC-0.1. at various scan rates (10–100 mV s<sup>-1</sup>) used to estimate the C<sub>dl</sub> and relative electrochemically active surface area in 0.5 M H<sub>2</sub>SO<sub>4</sub>. (c) C<sub>dl</sub> and relative electrochemically active surface area of CoSe<sub>2</sub>-NiSe<sub>2</sub>/NPFC.

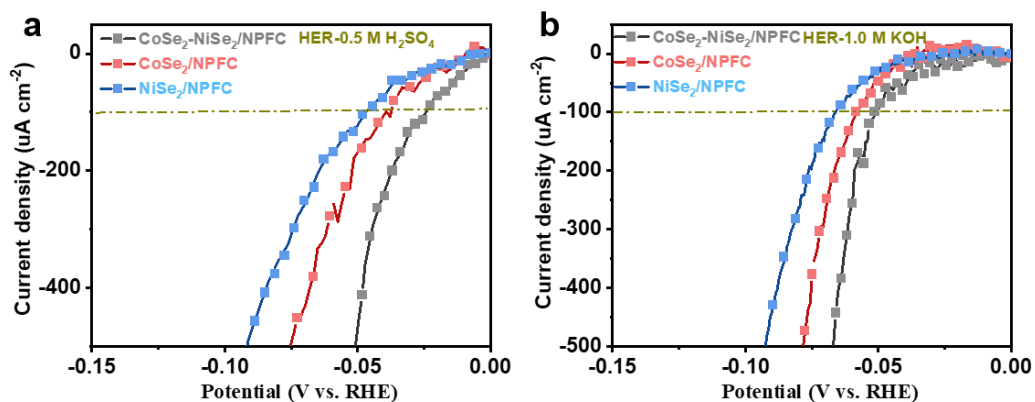

**Figure S11.** LSV curves of HER for CoSe<sub>2</sub>-NiSe<sub>2</sub>/NPFC, CoSe<sub>2</sub>/NPFC and NiSe<sub>2</sub>/NPFC normalized with ECSA in an (a) acidic solution and (b) alkaline solution.

### Calculation of TOF

By using the previous reported method to calculate the active sites and TOF of CoSe<sub>2</sub>-NiSe<sub>2</sub>/NPFC (Adv. Energy Mater. 2018, 1800484), for all samples in our work, the activesites and TOF were counted through the following calculation (Power Sources 2015, 297, 45; Small 2018, 14, 1706237;).

In order to calculate the active sites for each catalyst, CV measurements with potential window from 0 V to 0.8 V were carried out in phosphate buffered saline (PBS, PH= 7), where we assumed that no hydrogen evolution reaction together with electrochemical corrosion of our samples happened. After plotting the potential divide the scan rate (20 mV) against the current density, the current density-time curves were obtained (Figure S12a). The absolute current density ( $I_1$ , A cm<sup>-2</sup>) was integrated each second (s) to obtain the area (quantity of electric charge, Q) inside one cyclic envelope (A cm<sup>-2</sup>×s= C cm<sup>-2</sup>) containing both the cathodic and anodic current density. In this window, reversible one electron redox was completed (one for reduction and another for oxidation). So, the active sites (n) were acquired by dividing Q with 2 and the Faradaic constant (F, 96485 C·mol<sup>-1</sup>).

$$Q = \int_{40}^0 I_1 dt$$

$$n = \frac{Q}{2F}$$

The TOF could be calculated with the following equation

$$TOF = \frac{I_2}{2nF}$$

Where  $I_2$  was the current density from the LSV test in Figure 3, n was the obtained amount of the active site, and F was the Faradaic constant. For fare comparison, we selected the overpotential of 150 mV in acid for each specimen to get the value of  $I_2$ .

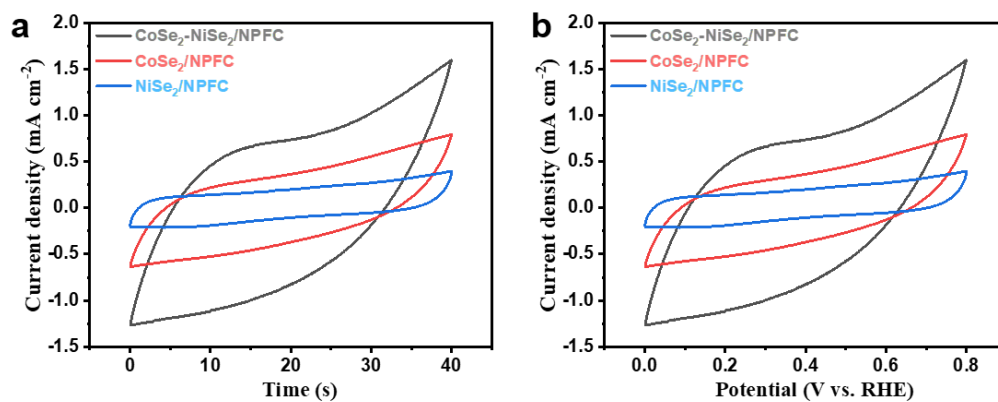

**Figure S12.** (a) CV curves of CoSe<sub>2</sub>-NiSe<sub>2</sub>/NPFC, CoSe<sub>2</sub>/NPFC and NiSe<sub>2</sub>/NPFC in 0.5 M H<sub>2</sub>SO<sub>4</sub> and (b) corresponding current density-time curves.

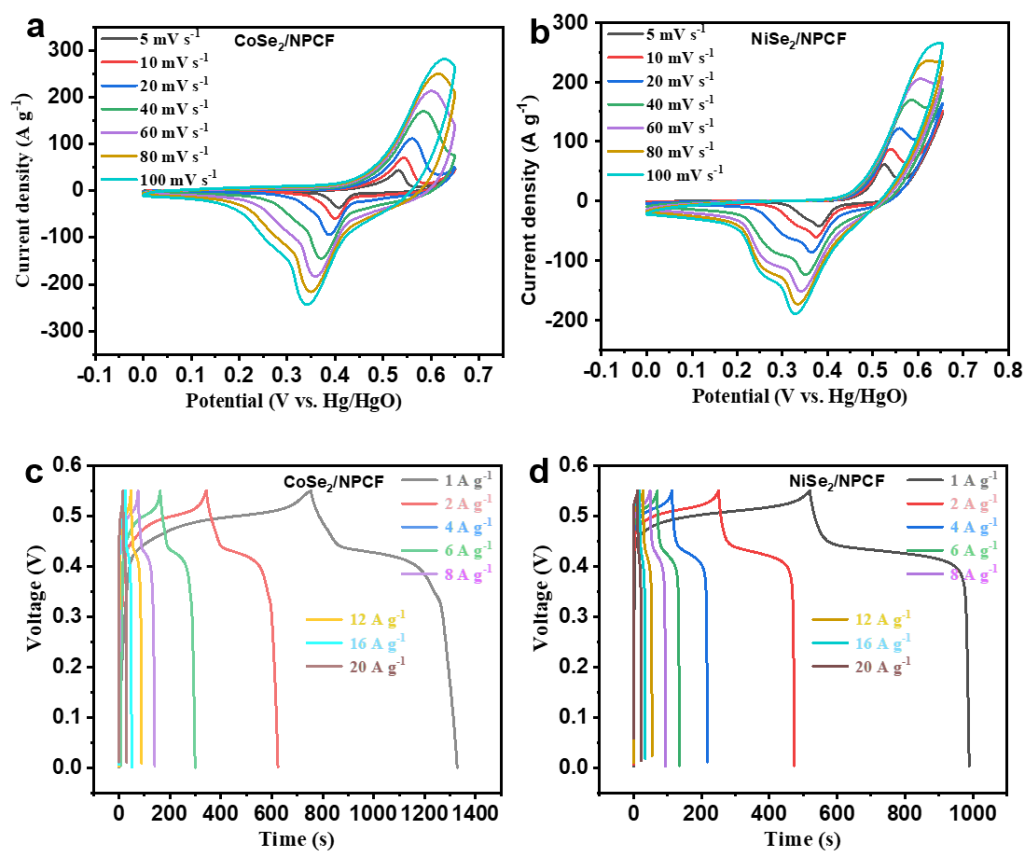

**Figure S13.** The CV of (a) CoSe<sub>2</sub>/NPFC and (b) NiSe<sub>2</sub>/NPFC; The GCD of (c) CoSe<sub>2</sub>/NPFC and (d) NiSe<sub>2</sub>/NPFC.

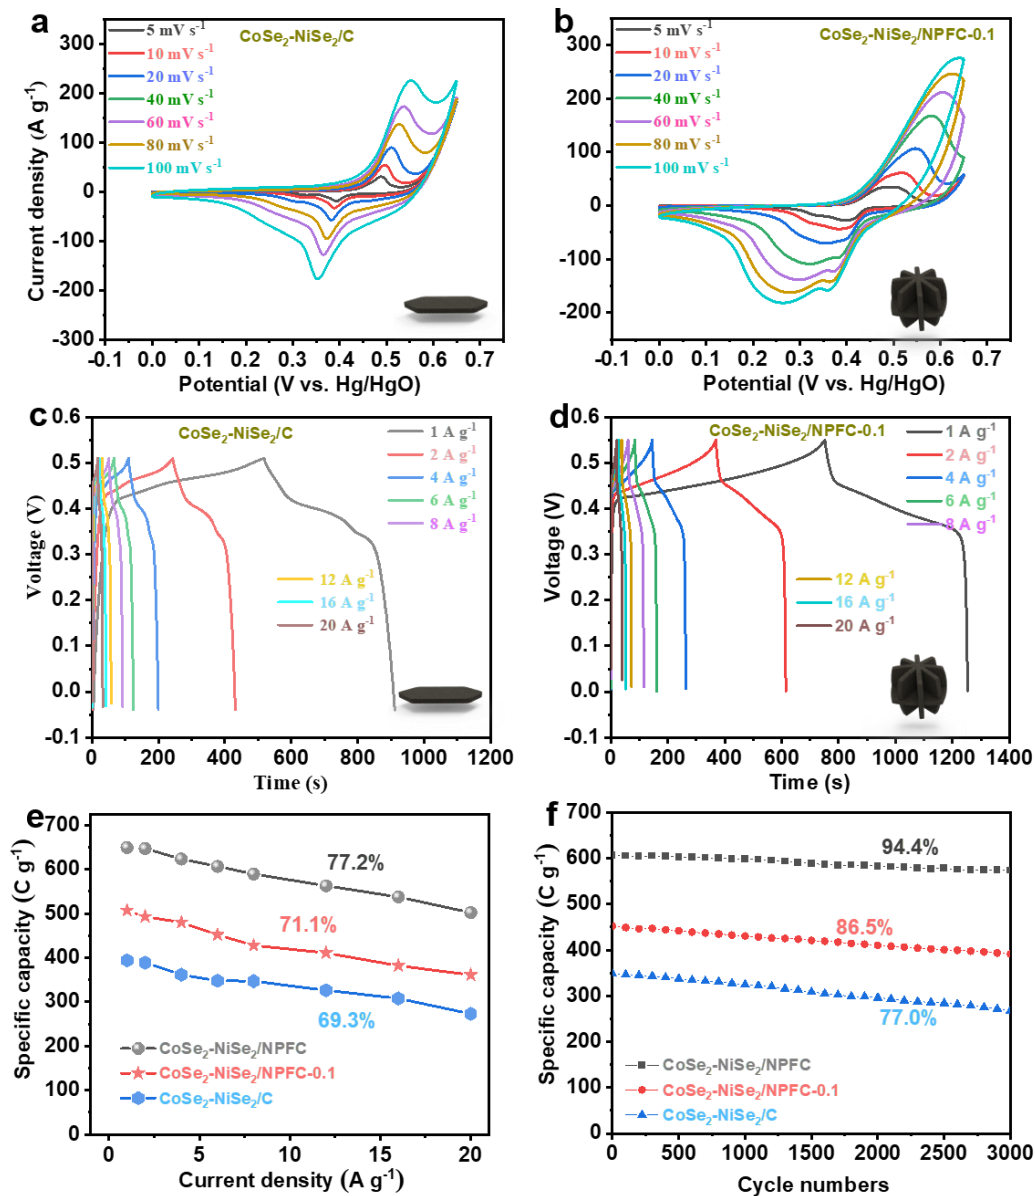

**Figure S14.** The CV of (a)  $\text{CoSe}_2\text{-NiSe}_2/\text{C}$  and (b)  $\text{CoSe}_2\text{-NiSe}_2/\text{NPFC-0.1}$ ; The GCD of (c)  $\text{CoSe}_2\text{-NiSe}_2/\text{C}$  and (d)  $\text{CoSe}_2\text{-NiSe}_2/\text{NPFC-0.1}$ ; (e) The Rate performance of  $\text{CoSe}_2\text{-NiSe}_2/\text{NPFC}$ ,  $\text{CoSe}_2\text{-NiSe}_2/\text{NPFC-0.1}$  and  $\text{CoSe}_2\text{-NiSe}_2/\text{C}$ ; (f) the durability performance of  $\text{CoSe}_2\text{-NiSe}_2/\text{NPFC}$ ,  $\text{CoSe}_2\text{-NiSe}_2/\text{NPFC-0.1}$  and  $\text{CoSe}_2\text{-NiSe}_2/\text{C}$ .

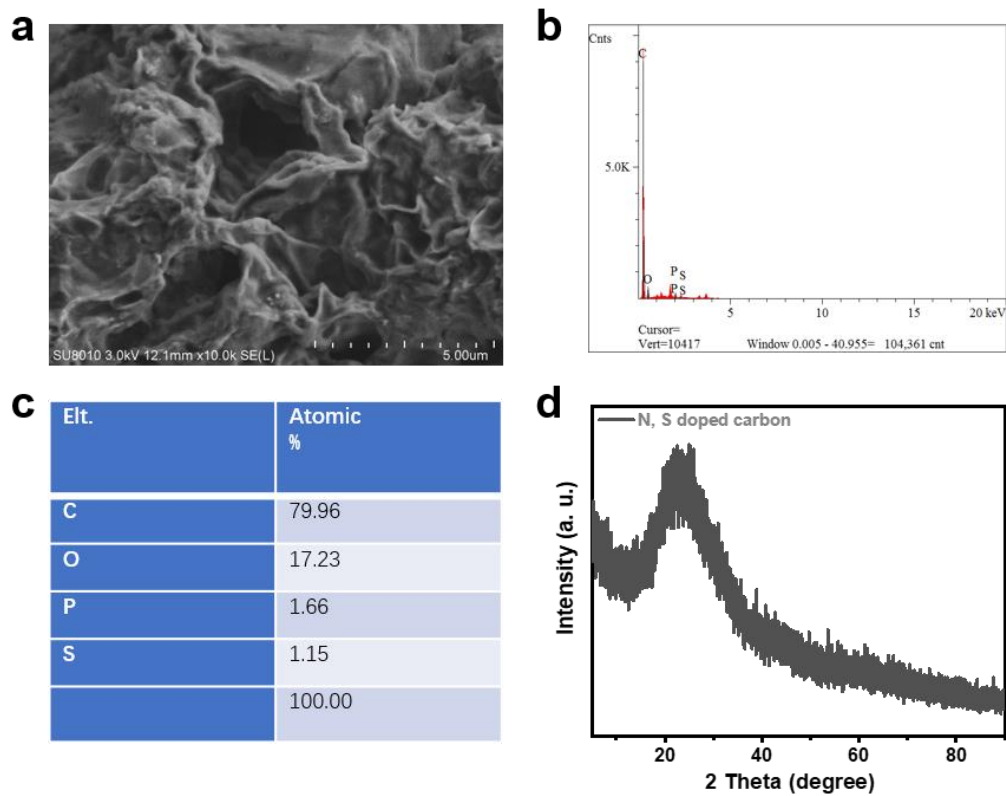

**Figure S15.** The (a) SEM, (b) EDS, (c) Elemental ratios and (d) XRD of N, S-doped carbon.

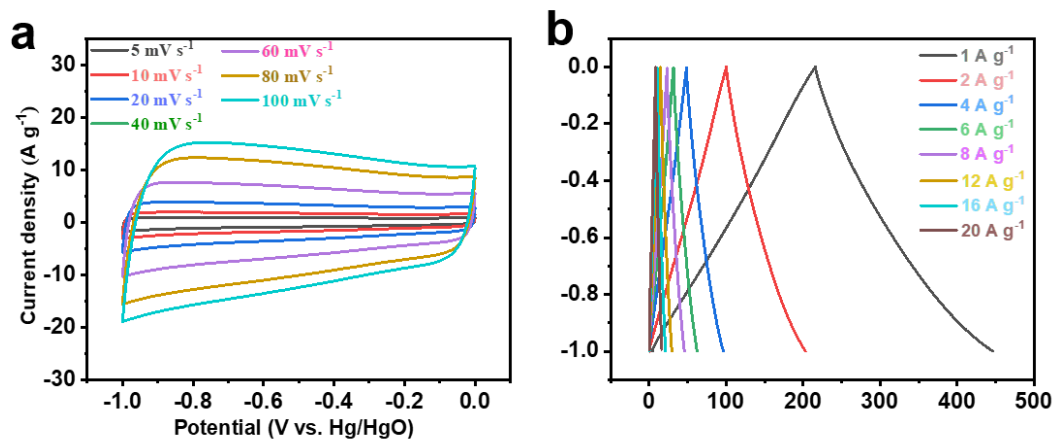

**Figure S16.** The (a) CV and (b) GCD of Active carbon.

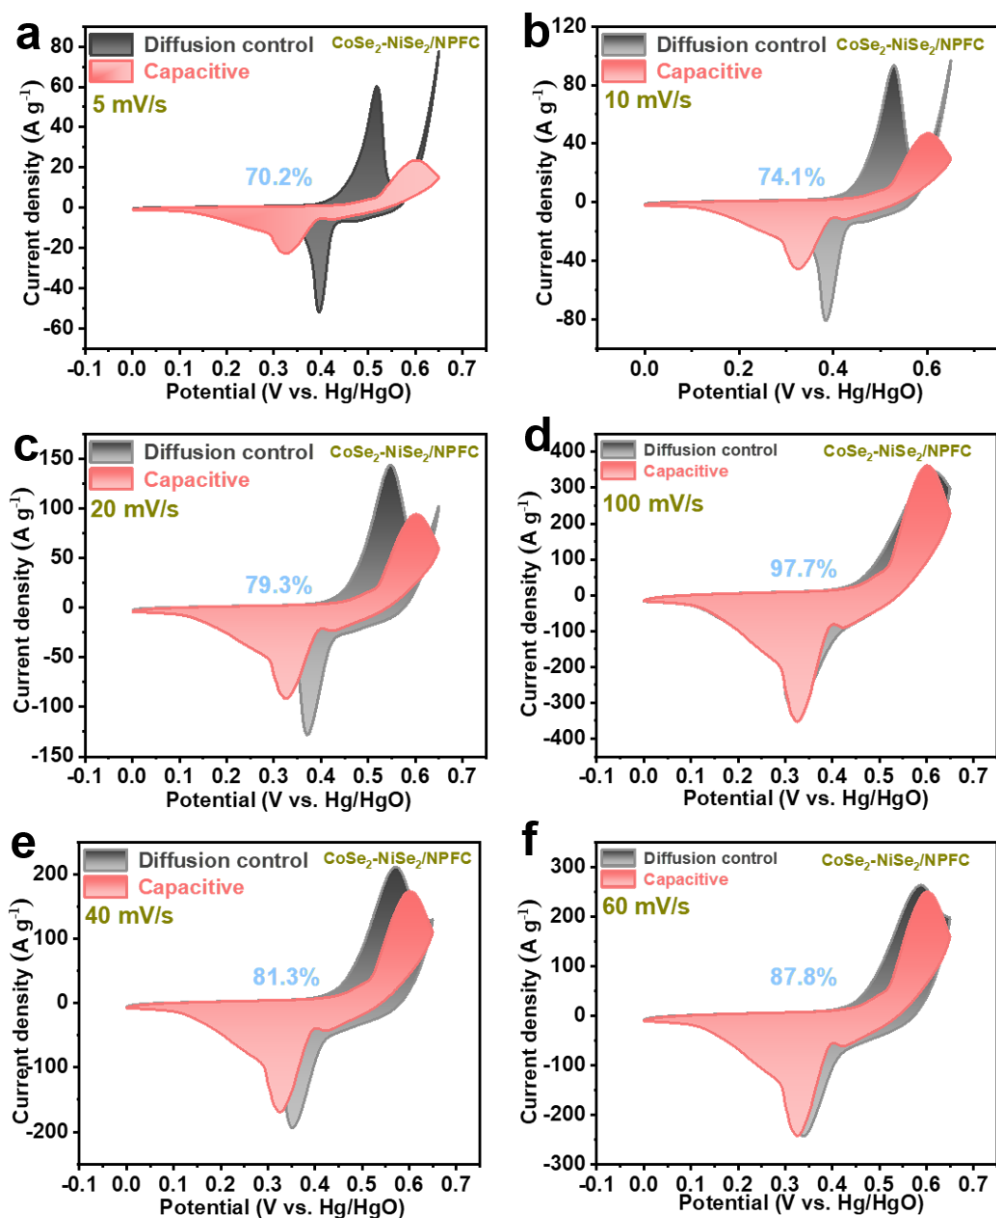

**Figure S17.** (a-f) The contribution of the capacitance of CoSe<sub>2</sub>-NiSe<sub>2</sub>/NPFC to the total current at different scan rates.



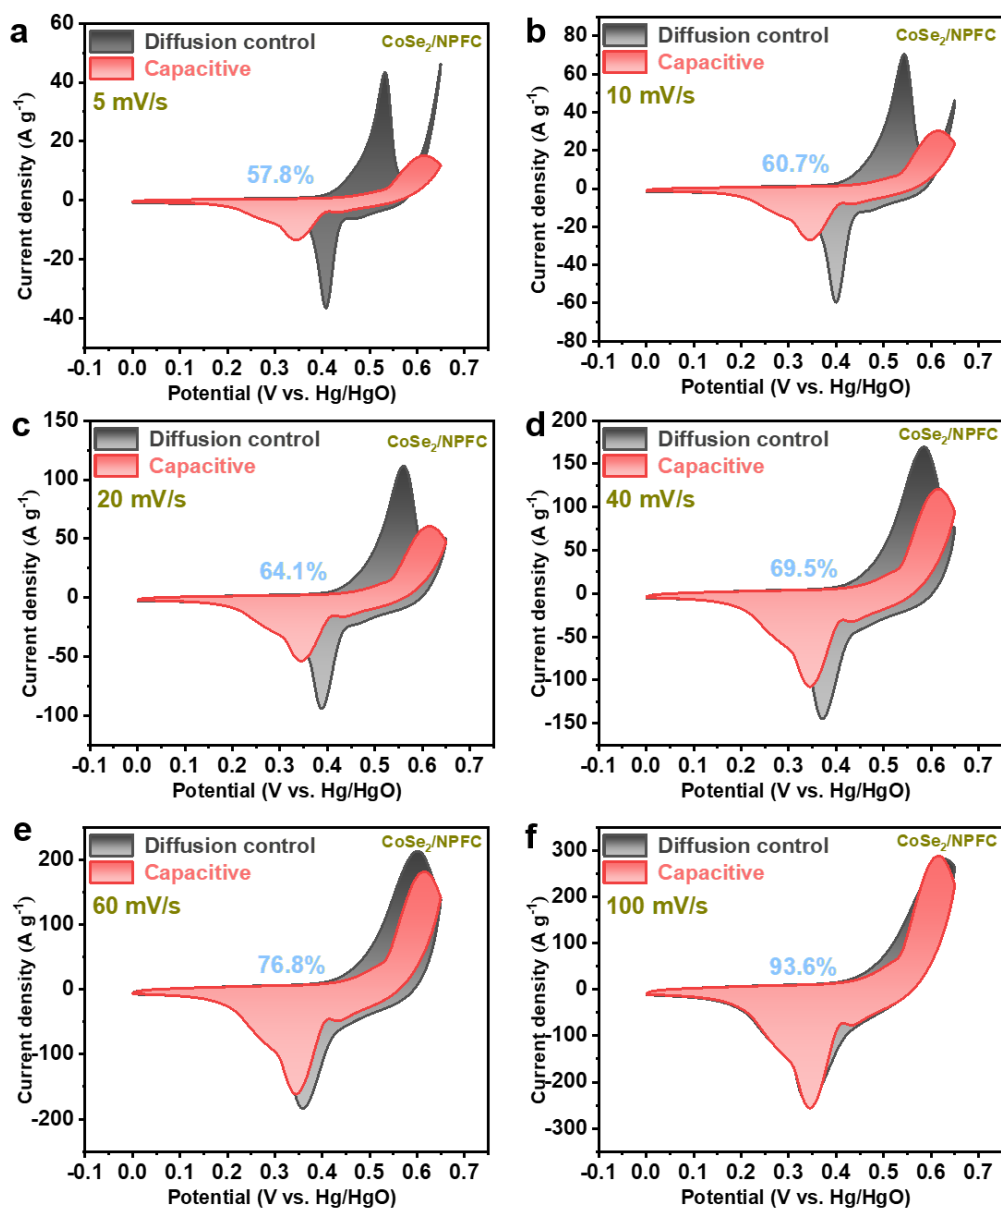

**Figure S18.** (a-f) The contribution of the capacitance of CoSe<sub>2</sub>/NPFC to the total current at different scan rates.

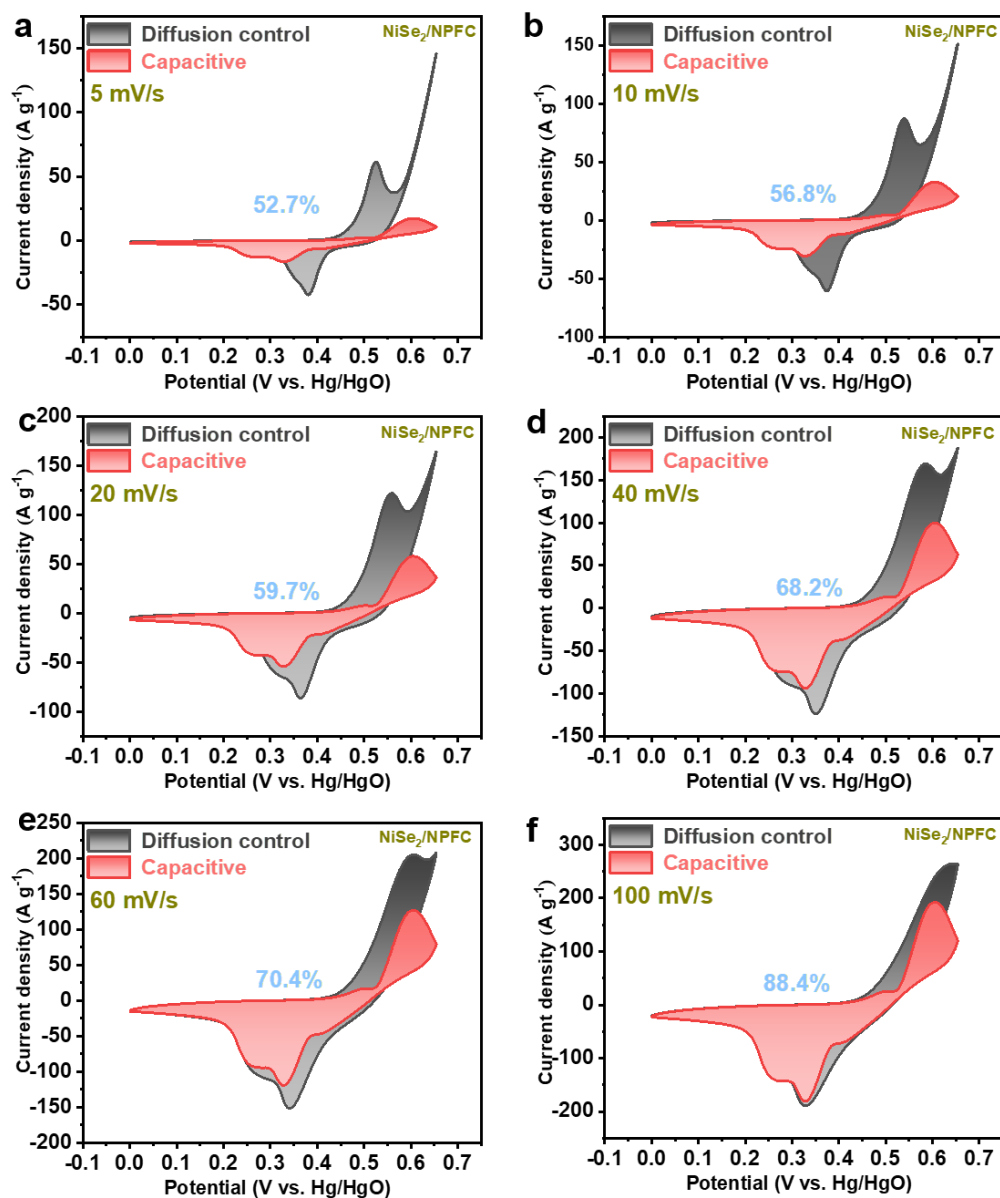

**Figure S19.** (a-f) The contribution of the capacitance of NiSe<sub>2</sub>/NPFC to the total current at different scan rates.

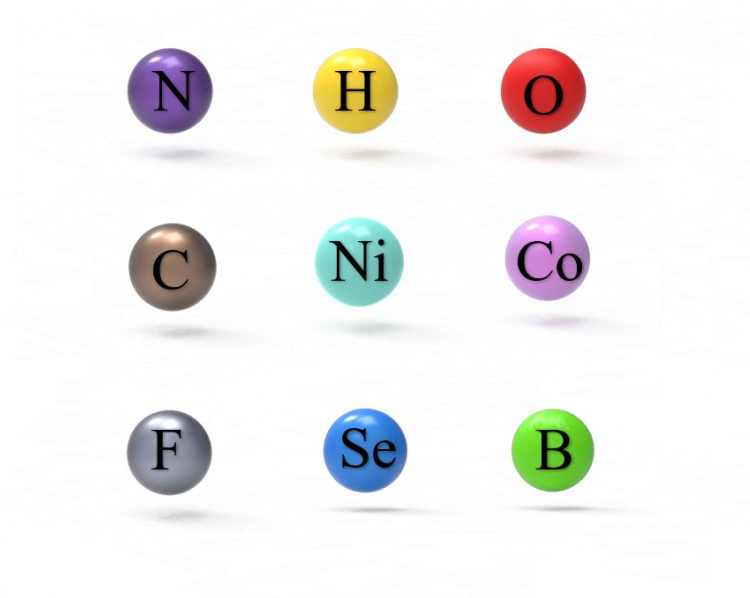

**Figure S20.** Explanation of each ball.

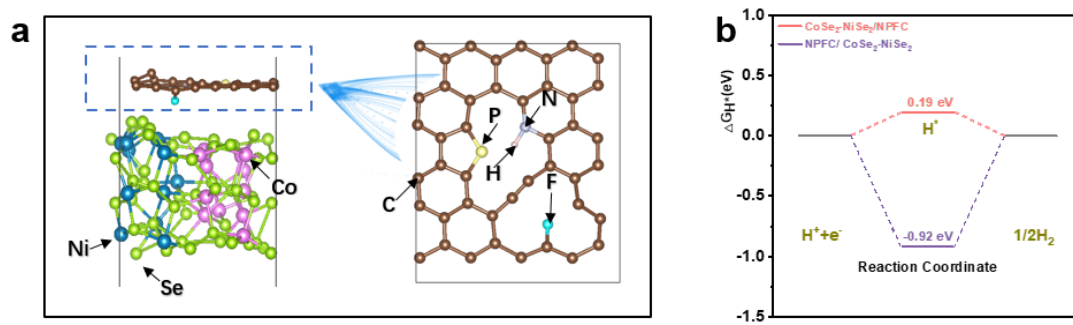

**Figure S21.** The model of (a) NPFC/CoSe<sub>2</sub>-NiSe<sub>2</sub> and (b) the  $\Delta G_{H^*}$  of NPFC/CoSe<sub>2</sub>-NiSe<sub>2</sub> and CoSe<sub>2</sub>-NiSe<sub>2</sub>/NPFC.

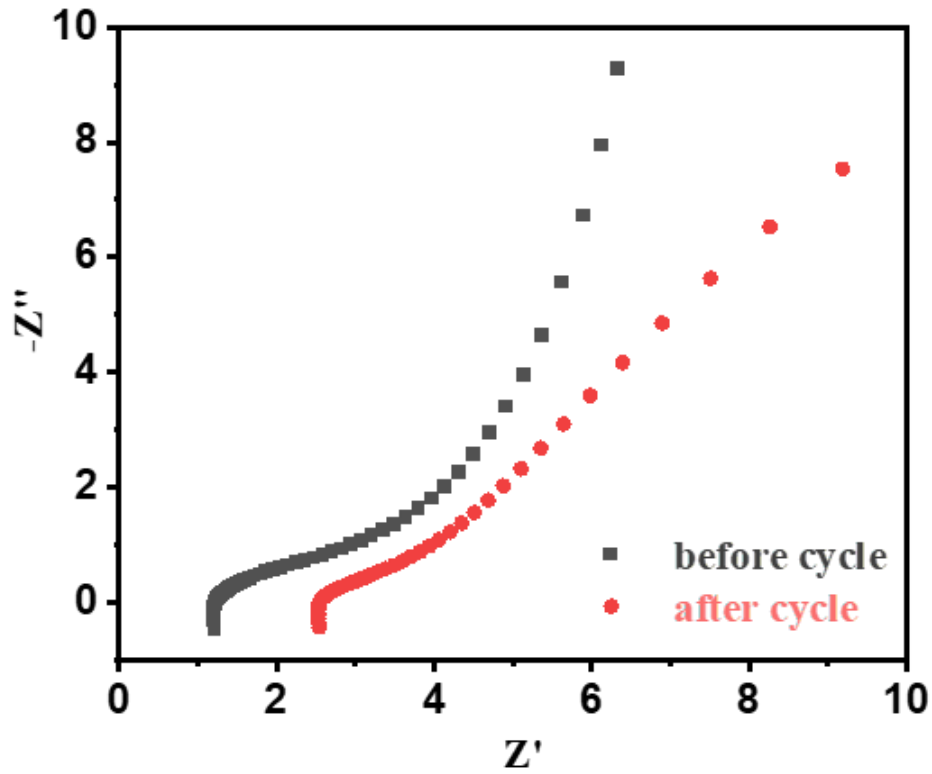

Figure S22. CP of CoSe<sub>2</sub>-NiSe<sub>2</sub>/NPFC//S, P-doped carbon before and after cycling.

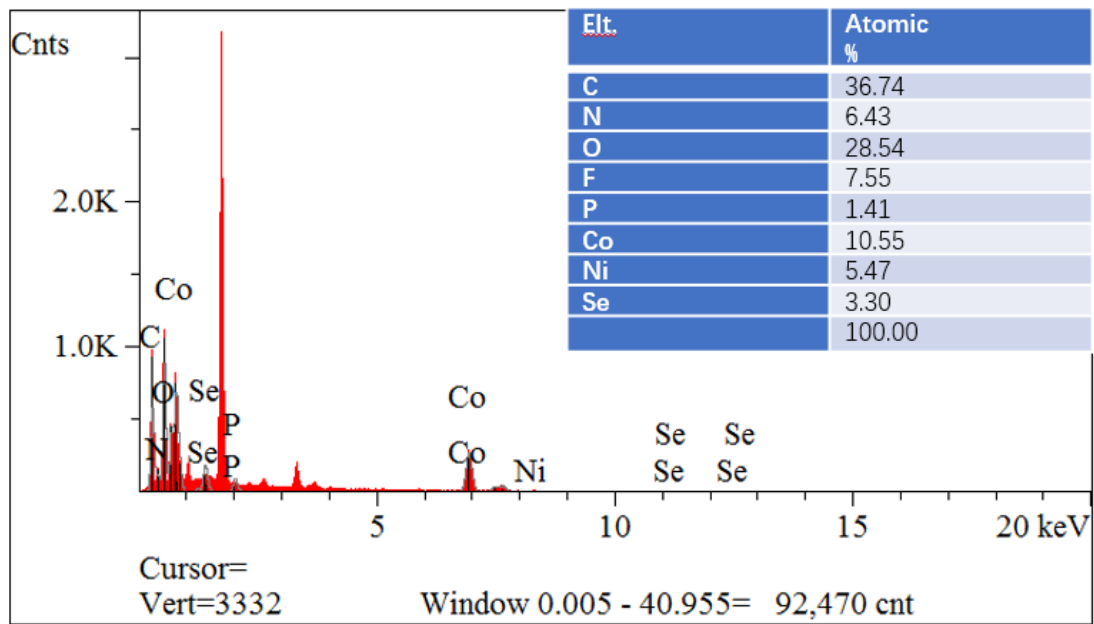

Figure S23. The EDS after cycling.

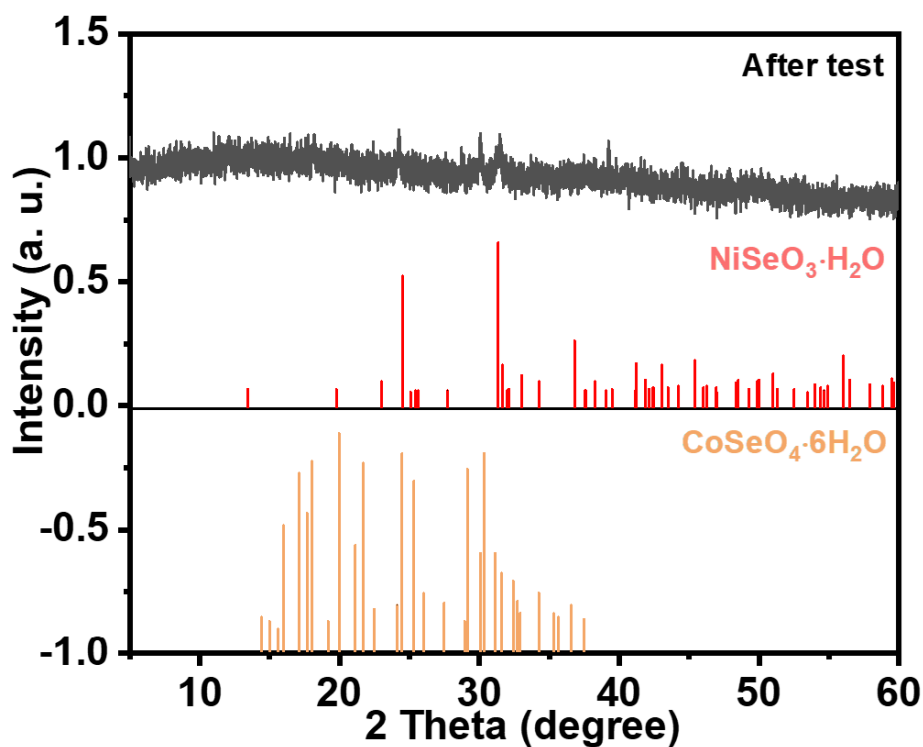

Figure S24. The XRD after cycling.

Table S1. EXAFS fitting parameters at the M K-edge for various samples.

| Sample                                         | Shell | $N^a$   | $R(\text{\AA})^b$ | $\sigma^2 \times 10^3 (\text{\AA}^2)^c$ | $\Delta E_0 (\text{eV})^d$ | R factor |
|------------------------------------------------|-------|---------|-------------------|-----------------------------------------|----------------------------|----------|
| Ni K-edge ( $S_0^2=0.703$ )                    |       |         |                   |                                         |                            |          |
| Ni foil                                        | Ni-Ni | 12*     | 2.483±0.003       | 6.2±0.3                                 | 7.0±0.6                    | 0.0024   |
| NiSe <sub>2</sub> /NPFC -Ni                    | Ni-Se | 6.7±0.1 | 2.478±0.001       | 5.8±0.2                                 | 1.0±0.4                    | 0.0009   |
| CoSe <sub>2</sub> -NiSe <sub>2</sub> /NPFC -Ni | Ni-Se | 6.3±0.2 | 2.458±0.004       | 7.5±0.5                                 | 0.7±1.0                    | 0.0039   |
| Co K-edge ( $S_0^2=0.783$ )                    |       |         |                   |                                         |                            |          |
| Co foil                                        | Co-Co | 12*     | 2.490±0.002       | 6.2±0.3                                 | 7.5±0.4                    | 0.0015   |
| CoSe <sub>2</sub> /NPFC -Co                    | Co-Se | 6.0±0.2 | 2.180±0.051       | 6.9±1.3                                 | 2.5±1.2                    | 0.0007   |
| CoSe <sub>2</sub> -NiSe <sub>2</sub> /NPFC -Co | Co-Se | 5.7±0.1 | 2.304±0.008       | 7.6±1.0                                 | 1.6±1.7                    | 0.0096   |

<sup>a</sup> $N$ : coordination numbers; <sup>b</sup> $R$ : bond distance; <sup>c</sup> $\sigma^2$ : Debye-Waller factors; <sup>d</sup> $\Delta E_0$ : the inner potential correction.  $R$  factor: goodness of fit.

Table S2. Electrocatalytic activity comparison of CoSe<sub>2</sub>-NiSe<sub>2</sub>/NPFC for HER in 0.5 M H<sub>2</sub>SO<sub>4</sub> solution with reported HER catalysts.

| Catalyst | $\eta$ (mV) at | Tafel | Ref. |
|----------|----------------|-------|------|
|----------|----------------|-------|------|

|                                                       | <b>j = 10</b>            | <b>slope</b>    |                                                                  |
|-------------------------------------------------------|--------------------------|-----------------|------------------------------------------------------------------|
|                                                       | <b>mA/cm<sup>2</sup></b> | <b>(mV/dec)</b> |                                                                  |
| <b>CoSe<sub>2</sub>-NiSe<sub>2</sub>/NPFC</b>         | <b>57</b>                | <b>35</b>       | <b>This work</b>                                                 |
| NiCo <sub>2</sub> Se <sub>4</sub> -NWs/NCNFs          | 200                      | 55.9            | <i>Electrochim. Acta</i> , 2020, 333,<br>135515                  |
| Mn <sub>0.05</sub> Co <sub>0.95</sub> Se <sub>2</sub> | 195                      | 36              | <i>J. Am. Chem. Soc.</i> , 2016, 138,<br>5087–5092               |
| Co <sub>0.9</sub> Ni <sub>0.1</sub> Se                | 185.7                    | 58              | <i>Angew. Chem. Int. Ed.</i> <b>2020</b> , 59,<br>22743–22748    |
| CoSe@NCNT/NCN                                         | 197                      | 43              | <i>Electrochim. Acta</i> <b>2020</b> , 337,<br>135685            |
| CoSe <sub>2</sub> /Ti                                 | 110                      | 48.5            | <i>J. Mater. Chem. A</i> <b>2016</b> , 4,<br>4553–4561           |
| CoSe <sub>2</sub> /HOPG                               | 272                      | 61              | <i>ACS Energy Lett.</i> <b>2016</b> , 1, 607–611                 |
| CoSe <sub>2</sub> @carbon<br>nanotubes                | 132                      | 82              | <i>Nano Energy</i> <b>2016</b> , 28, 143–150                     |
| CoSe <sub>2</sub> @graphene/GC                        | 210                      | 42              | <i>Chem. Eng. J.</i> <b>2017</b> , 321, 105–112                  |
| CoSe <sub>2</sub> /GC                                 | 150                      | 51              | <i>Nanotechnology</i> <b>2017</b> , 28, 315401                   |
| CoSe <sub>2</sub> -carbon fiber/GC                    | 133                      | -               | <i>J. Alloy Compd.</i> <b>2017</b> , 702,<br>611–618             |
| CoSe <sub>2</sub> NW/carbon cloth                     | 130                      | 32              | <i>ACS Appl. Mater. Interfaces</i> <b>2015</b> ,<br>7, 3877–3881 |

**Table S3.** Electrocatalytic activity comparison of Catalyst CoSe<sub>2</sub>-NiSe<sub>2</sub>/NPFC for HER in 1.0 M KOH solution with reported HER catalysts.

| Catalyst                                             | $\eta$ (mV) at<br>$j=10 \text{ mA/cm}^2$ | Tafel<br>slope<br>(mV/dec) | Ref.                                                                |
|------------------------------------------------------|------------------------------------------|----------------------------|---------------------------------------------------------------------|
| CoSe <sub>2</sub> -NiSe <sub>2</sub> /NPFC           | 86                                       | 28                         | <b>This work</b>                                                    |
| MoSe <sub>2</sub> @NiCo <sub>2</sub> Se <sub>4</sub> | 89                                       | 85                         | <i>Small</i> <b>2022</b> , 18, 2200622                              |
| Co <sub>0.75</sub> Ni <sub>0.25</sub> Se/NF          | 106                                      | 74                         | <i>Nanoscale</i> <b>2019</b> ,<br>11, 7959.                         |
| NiSe <sub>2</sub> @NC                                | 162                                      | 10                         | <i>ACS Appl. Mater. Interfaces</i> <b>2020</b> ,<br>12, 28288–28297 |
| F-CoS <sub>2</sub> @NF                               | 112                                      | 61                         | <i>Small</i> <b>2019</b> , 15, 1904670                              |
| c-CoSe <sub>2</sub> /CC                              | 190                                      | 85                         | <i>Adv. Mater.</i> <b>2016</b> , 28, 7527–7532                      |
| Ni/NiS                                               | 230                                      | 115                        | <i>Adv. Funct. Mater.</i> <b>2016</b> , 26,<br>3314–3323            |
| MoS <sub>2</sub> /MoSe <sub>2</sub>                  | 235                                      | 96                         | <i>Nano Energy</i> <b>2018</b> , 48, 337–344                        |
| Co <sub>9</sub> S <sub>8</sub> @MoS <sub>2</sub>     | 177                                      | 84                         | <i>J. Catal.</i> <b>2020</b> , 385, 129–139                         |
| MoSe <sub>2</sub> /SnS <sub>2</sub>                  | 285                                      | 109                        | <i>Nat. Commun.</i> <b>2019</b> , 10, 982                           |
| Co-MoS <sub>2</sub> /Mo <sub>2</sub> CT <sub>x</sub> | 112                                      | 82                         | <i>Appl. Catal. B</i> <b>2019</b> , 254, 432–442                    |
| Co <sub>2</sub> P/Co-Foil                            | 154                                      | 59                         | <i>J. Mater. Chem. A</i> <b>2017</b> , 5,<br>10561–10566            |
| CoP@NPMG                                             | 151                                      | 75                         | <i>Nanoscale</i> <b>2018</b> , 10, 2603–2612                        |

**Table S4.** Electrochemical performance comparison of CoSe<sub>2</sub>-NiSe<sub>2</sub>/NPFC for supercapacitors with other reported materials.

| Materials                                                          | Energy density and power density                                                                          | Ref.                                                |
|--------------------------------------------------------------------|-----------------------------------------------------------------------------------------------------------|-----------------------------------------------------|
| CoSe <sub>2</sub> -NiSe <sub>2</sub> /NPFC                         | 40.8 Wh kg <sup>-1</sup> at 750 W kg <sup>-1</sup>                                                        | This work                                           |
| Ni <sub>0.85</sub> Se@MoSe <sub>2</sub>                            | 19.3 Wh kg <sup>-1</sup> at 3900 W kg <sup>-1</sup>                                                       | <i>J. Mater. Sci.</i> <b>2018</b> , 53, 3647–3660   |
| (Ni <sub>x</sub> Co <sub>1-x</sub> ) <sub>9</sub> Se <sub>8</sub>  | 17 Wh kg <sup>-1</sup> at 3.1 kW kg <sup>-1</sup>                                                         | <i>Adv. Energy Mater.</i> <b>2018</b> , 8, 1801392  |
| GNR/Co <sub>0.85</sub> Se                                          | 18.5 Wh kg <sup>-1</sup> at 6.77 kW kg <sup>-1</sup>                                                      | <i>Adv. Funct. Mater.</i> 29 (2019) 1904182         |
| Ni <sub>3</sub> Se <sub>2</sub> NSs@CF                             | 32.8 Wh kg <sup>-1</sup> at 677.03 W kg <sup>-1</sup>                                                     | <i>Adv. Energy Mater.</i> <b>2017</b> , 7, 1601362  |
| NiCo <sub>2</sub> (S <sub>x</sub> Se <sub>1-x</sub> ) <sub>5</sub> | 47.2 Wh kg <sup>-1</sup> at 801 W kg <sup>-1</sup>                                                        | <i>Chem. Eng. J.</i> <b>2018</b> , 351, 678–687     |
| (Ni <sub>0.33</sub> Co <sub>0.67</sub> )Se <sub>2</sub> CHSs       | 21.1 Wh kg <sup>-1</sup> at 400 W kg <sup>-1</sup><br>29.1 Wh kg <sup>-1</sup> at 800 W kg <sup>-1</sup>  | <i>Electrochim. Acta</i> <b>2018</b> , 281, 109-116 |
| NiCoP/NPC                                                          | 40.2 Wh kg <sup>-1</sup> at 800 W kg <sup>-1</sup><br>26.8 Wh kg <sup>-1</sup> at 7973 W kg <sup>-1</sup> | <i>Appl. Catal. B</i> <b>2021</b> , 283, 119635     |
| NiCoP nanoplates                                                   | 32.9 Wh kg <sup>-1</sup> at 1301 W kg <sup>-1</sup>                                                       | <i>Nano Energy</i> <b>2017</b> , 35, 331–340        |
| Ni <sub>3</sub> Se <sub>2</sub> NSs@CF                             | 22.1 Wh kg <sup>-1</sup> at 6.0 kW kg <sup>-1</sup>                                                       | <i>Adv. Energy Mater.</i> 7 (2017) 1601362.         |

## References

- [1] Kresse, G.; Furthmüller, J. Efficiency of Ab-Initio Total Energy Calculations for Metals and Semiconductors Using a Plane-Wave Basis Set. *Comput. Mater. Sci.* 199, 6, 15–50.
- [2] Kresse, G.; Furthmüller, J. Efficient Iterative Schemes for Ab Initio Total-Energy Calculations Using a Plane-Wave Basis Set. *Phys. Rev. B* 1996, 54, 11169–11186.



- [3] Perdew, J. P.; Burke, K.; Ernzerhof, M. Generalized Gradient Approximation Made Simple. *Phys. Rev. Lett.* 1996, 77, 3865–3868.
- [4] Kresse, G.; Joubert, D. From Ultrasoft Pseudopotentials to the Projector Augmented-Wave Method. *Phys. Rev. B* 1999, 59, 1758-1775.
- [5] Blöchl, P. E. Projector Augmented-Wave Method. *Phys. Rev. B* 1994, 50, 17953–17979.
- [6].Grimme, S.; Antony, J.; Ehrlich, S.; Krieg, H. *J. Chem. Phys.* 2010, 132, 154104.
- [7].H. J. Monkhorst and J. D. Pack, *Phys. Rev. B*, 1976, 13, 5188-5192.
- [8] J. Rossmeisl, A. Logadottir, J. K. Nørskov, *Chem. Phys.* 319 (2005) 178-184.
- [9] J. K. Nørskov, J. Rossmeisl, A. Logadottir, L. R. K. J. Lindqvist, J. R. Kitchin, T. Bligaard, H. Jonsson, *J. Phys. Chem. B* 108 (2004) 17886-17892.
